# Supplementary material for: Embodiment and Performance in the Supernumerary Hand Illusion in Augmented Reality
Source: Frontiers journal article supplement (doi:10.3389/fcomp.2021.694916), 2021-08-06
Supplement: Data_Sheet_1.PDF [file Data_Sheet_1.PDF]

## Supplementary Material

**Table S1.** Participant comments, separated into individual statements and grouped into categories.

| <i>Category</i> | <i>Statement</i>                                                    | <i>Frequency</i> |
|-----------------|---------------------------------------------------------------------|------------------|
| Hand rotation   | unpleasant that hand in <i>Hand</i> did not rotate                  | 2                |
|                 | unpleasant that hand in <i>Arm</i> did not rotate                   | 2                |
|                 | hand in <i>Arm</i> had a different orientation than mine            | 2                |
|                 | pleasant that hand in <i>Hand</i> did not rotate                    | 1                |
| Depth           | difficult to see depth in <i>Hand</i>                               | 3                |
|                 | difficult to see depth in <i>Arm</i>                                | 4                |
| Embodiment      | no ownership in <i>Hand</i>                                         | 2                |
|                 | no ownership in <i>Arm</i>                                          | 3                |
|                 | hand in <i>Hand</i> was a cursor                                    | 1                |
| Movement        | movement in <i>Arm</i> was different than mine                      | 12               |
|                 | movement in <i>Arm</i> was more difficult than in <i>Hand</i>       | 13               |
|                 | movement in <i>Hand</i> was more difficult than in <i>Arm</i>       | 1                |
|                 | movement in <i>Arm</i> was more sensitive                           | 1                |
|                 | pleasant that the hand in <i>Hand</i> had no hinges                 | 2                |
| Appearance      | arm and hand in <i>Arm</i> had strange appearance                   | 3                |
|                 | hand in <i>Hand</i> had strange appearance                          | 2                |
| Visual presence | absence of arm in <i>Hand</i> did not matter                        | 1                |
|                 | presence of arm in <i>Arm</i> was pleasant                          | 1                |
|                 | arm occupied too much of my view                                    | 3                |
|                 | arm occupying my view did not matter in regards to controlling it   | 1                |
|                 | real right hand not always in view so did not feel like three hands | 1                |
| Experiment      | it was tiring                                                       | 2                |
|                 | meta statement on setup or execution                                | 7                |

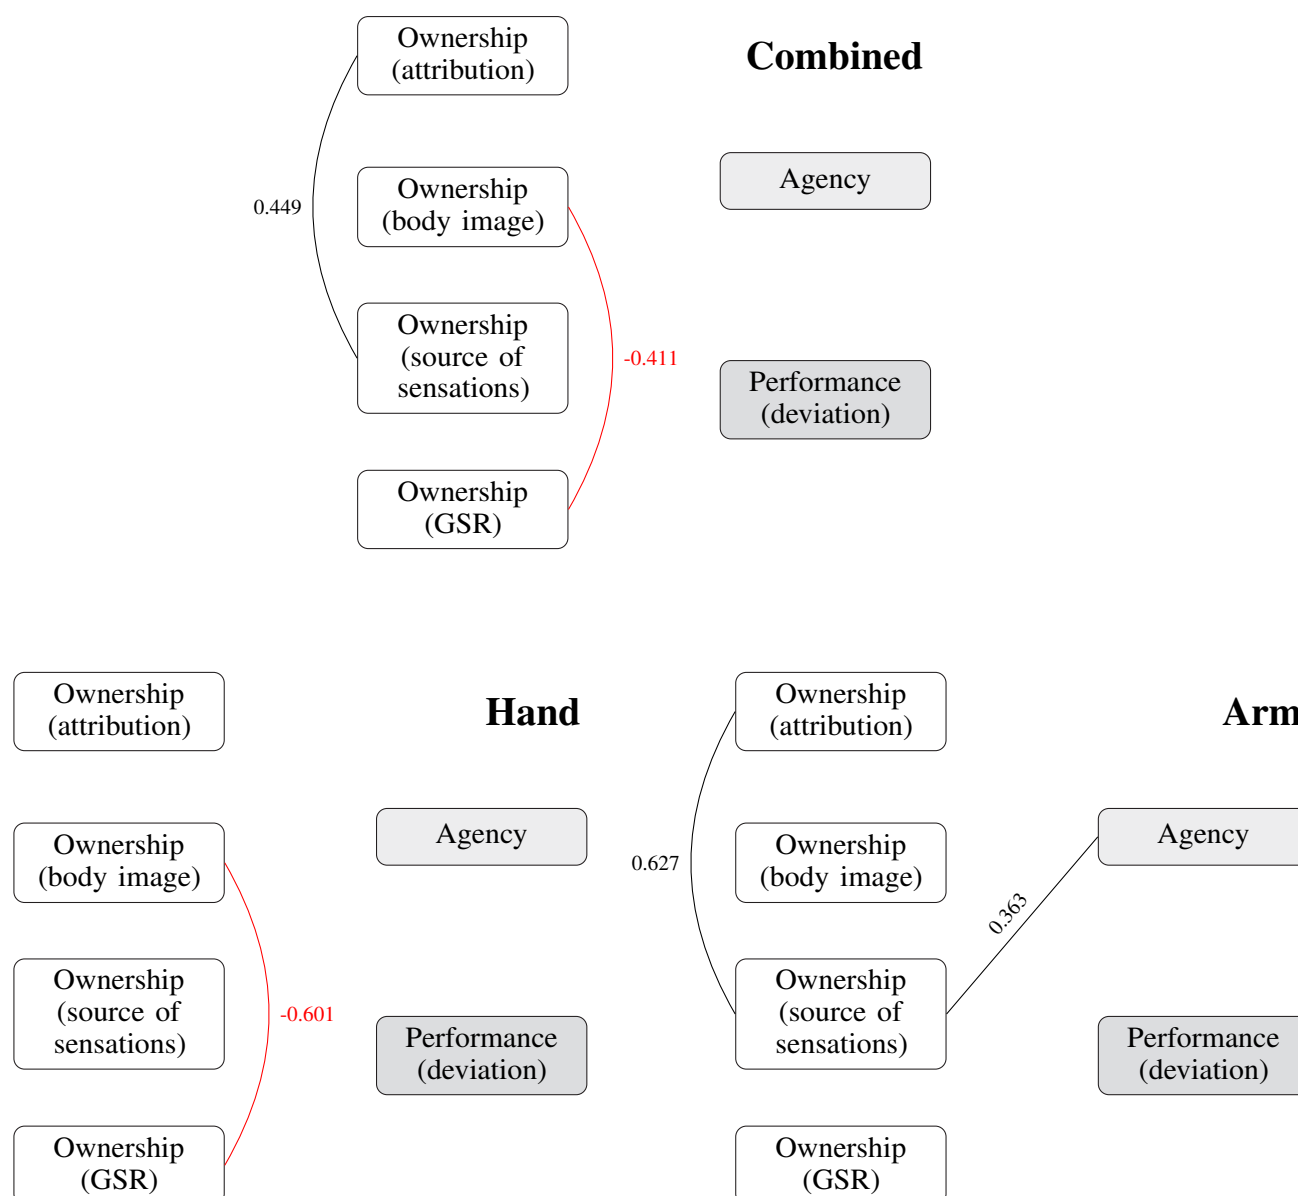

**Figure S1.** Maps of all significant correlations with corresponding correlation coefficients for each of the four statistical approaches: **Combined** Spearman correlation on combined data, **Hand** Spearman correlation on *Hand* data, **Arm** Spearman correlation on *Arm* data. The red lines indicate a correlation direction opposite to hypothesized.

**Table S2.** Alternative statistical approaches to the correlation analysis. Column *Combined* corresponds to the Spearman correlation on the combined data (not repeated measures), and *Hand* and *Arm* to the Spearman correlation on the data split by condition; in the *Arm* column the GSR-Perf. pair uses a Pearson correlation. Fields marked by a (-) indicate that the corresponding pair violated the monotonicity assumption. Statistically significant correlations (one-tailed) are marked by a (\*) and marginally significant correlations by a (●).

| Measure(s)    | Pair      | Combined                                          | Hand                                         | Arm                                         |
|---------------|-----------|---------------------------------------------------|----------------------------------------------|---------------------------------------------|
| Ownership     | Q1-Q2     | -                                                 | -                                            | -                                           |
|               | Q1-Q3     | $\rho = 0.449$<br>$p = 0.001^*$<br>$N = 46$       | $\rho = 0.192$<br>$p = 0.190$<br>$N = 23$    | $\rho = 0.627$<br>$p = 0.001^*$<br>$N = 23$ |
|               | Q2-Q3     | -                                                 | -                                            | -                                           |
|               | Q1-GSR    | $\rho = 0.024$<br>$p = 0.439$<br>$N = 42$         | -                                            | -                                           |
|               | Q2-GSR    | $\rho = -0.411$<br>$p = 0.003^*$<br>$N = 42$      | $\rho = -0.601$<br>$p = 0.002^*$<br>$N = 21$ | $\rho = -0.279$<br>$p = 0.111$<br>$N = 21$  |
|               | Q3-GSR    | -                                                 | -                                            | -                                           |
| Own. - Age.   | Q1-Q4     | -                                                 | -                                            | $\rho = 0.289$<br>$p = 0.091$<br>$N = 23$   |
|               | Q2-Q4     | -                                                 | -                                            | $\rho = 0.139$<br>$p = 0.264$<br>$N = 23$   |
|               | Q3-Q4     | $\rho = 0.227$<br>$p = 0.065^\bullet$<br>$N = 46$ | -                                            | $\rho = 0.363$<br>$p = 0.044^*$<br>$N = 23$ |
|               | GSR-Q4    | -                                                 | -                                            | -                                           |
| Own. - Perf.  | Q1-Perf.  | -                                                 | -                                            | -                                           |
|               | Q2-Perf.  | -                                                 | -                                            | -                                           |
|               | Q3-Perf.  | -                                                 | -                                            | -                                           |
|               | GSR-Perf. | -                                                 | -                                            | $r = -0.081$<br>$p = 0.363$<br>$N = 21$     |
| Age. - Perf.  | Q4-Perf.  | -                                                 | -                                            | -                                           |
| Self-location | Q5-Q6     | $\rho = 0.257$<br>$p = 0.042^*$<br>$N = 46$       | -                                            | $\rho = 0.634$<br>$p = 0.001^*$<br>$N = 23$ |
|               | Q5-Q7     | $\rho = 0.518$<br>$p = 0.0001^*$<br>$N = 46$      | -                                            |                                             |
|               | Q6-Q7     | -                                                 | -                                            |                                             |
